# Supplementary material for: Glucose Activates Vagal Control of Hyperglycemia and Inflammation in Fasted Mice
Source: PubMed Central journal article supplement (PMC6354016; doi:10.1038/s41598-018-36298-z), 2019-01-30
Supplement: 41598_2018_36298_MOESM1_ESM.pdf [file 41598_2018_36298_MOESM1_ESM.pdf]

# **Glucose Activates Vagal Control Of hyperglycemia And Inflammation In Fasted Mice.**

**Biju Joseph, Guilherme Shimojo, Zhifeng Li, Maria del Rocio  
Thompson-Bonilla, Roshan Shah, Alexandre Kanashiro,  
Helio C. Salgado & Luis Ulloa.**

***Supplementary Figures.***

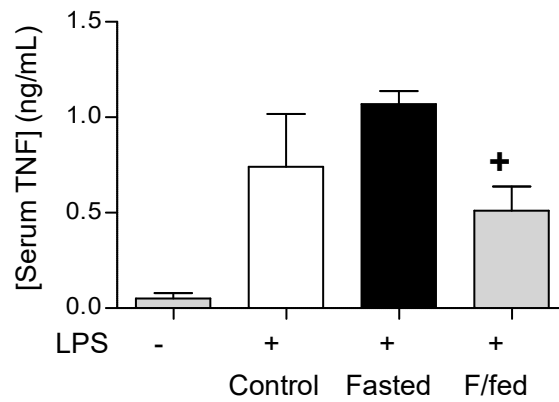

**Supplementary Fig.1. Serum TNF levels in control and fasted mice in endotoxemia.**

(a) Mice were (control) fed ad libitum, (fasted) fasted for 24h, or (F/fed) fasted for 20 and fed for 4h before the LPS challenge(10 mg/kg; i.p.). Serum TNF levels were analyzed at 1.5h post-LPS. +p<0.05 vs fasted (n=4/group, One-way ANOVA).

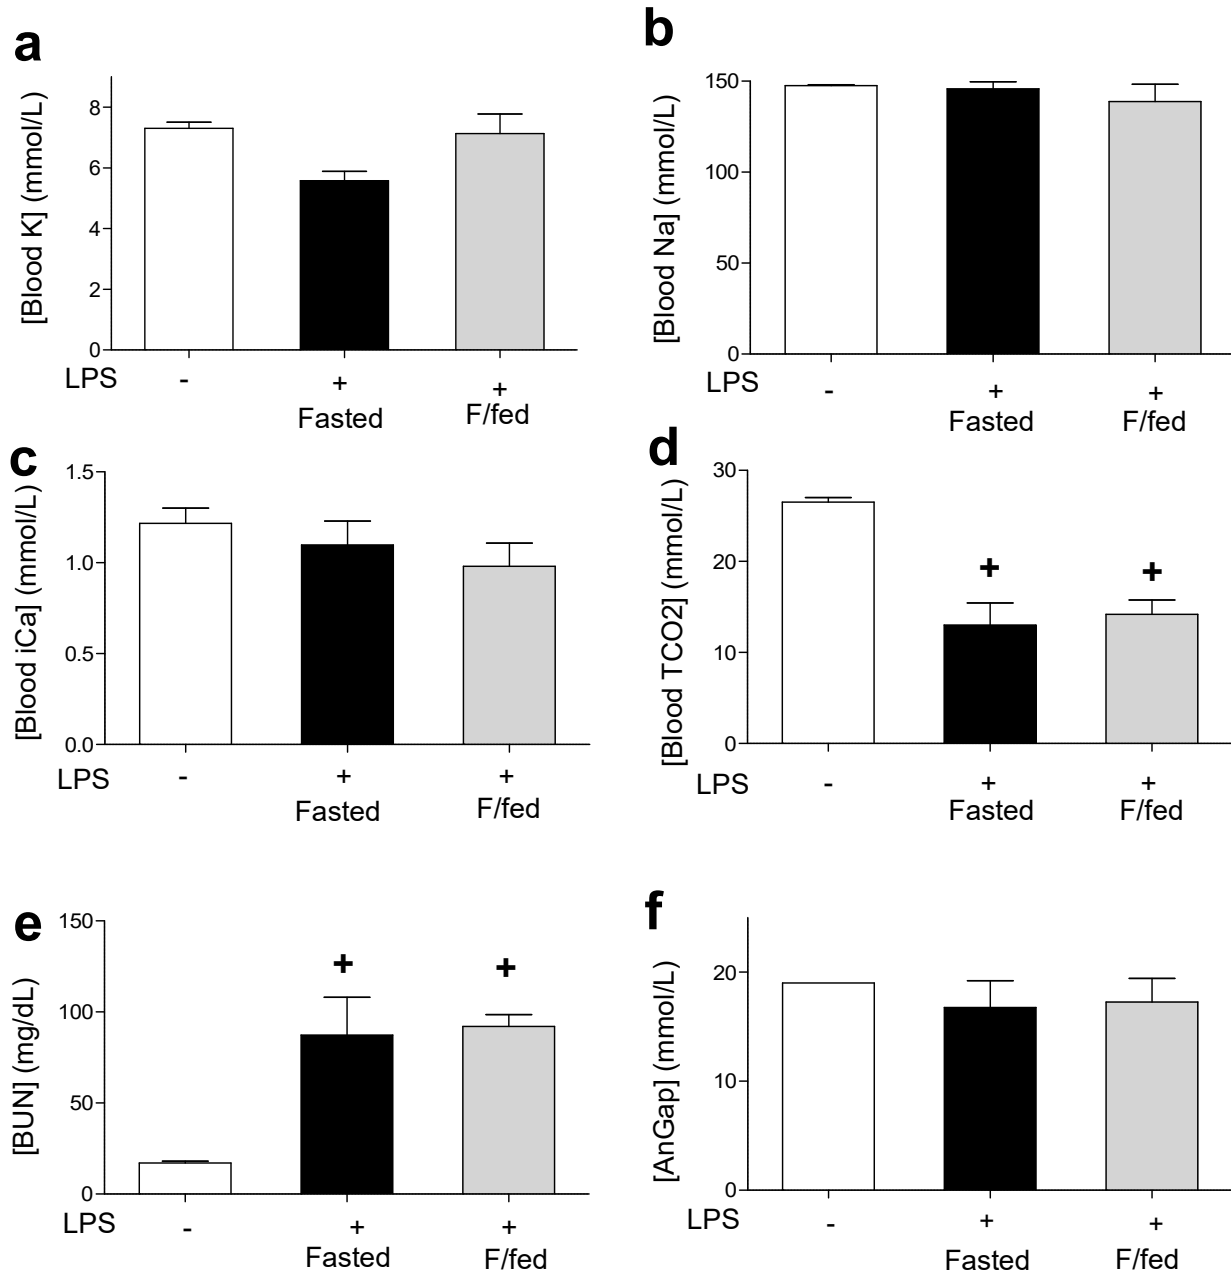

**Supplementary Fig. 2. Blood chemistry analyses of fasted and fed mice in endotoxemia.**

Blood levels of (a) potassium(K), (b) sodium(Na), (c) ionized calcium(iCa), (d) total carbon dioxide(TCO<sub>2</sub>), (e) urea nitrogen(BUN), and (f) anion gap(AnGap) at 24h post-LPS. \*p<0.05 vs LPS(n=4/group, One-way ANOVA).

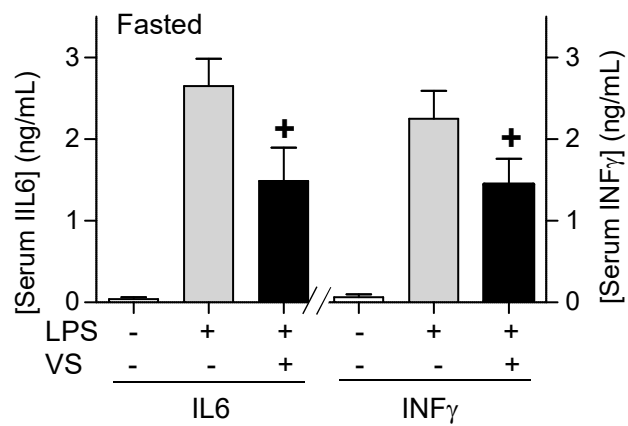

**Supplementary Fig.3. Vagal stimulation attenuates serum levels of inflammatory cytokines in endotoxemia.** Fasted mice received vagal stimulation and the serum levels of IL-6 and INF $\gamma$  were analyzed at 4 hours post-LPS. + $p < 0.05$  vs LPS (n=4/group; One-way ANOVA).
